# Supplementary material for: Quorum Sensing in Streptococcus mutans Regulates Production of Tryglysin, a Novel RaS-RiPP Antimicrobial Compound
Source: PubMed Central journal article supplement (PMC8092268; doi:10.1128/mbio.02688-20), 2021-03-16
Supplement: mBio.02688-20-sf001.pdf [file mBio.02688-20-sf001.pdf]

Figure S1

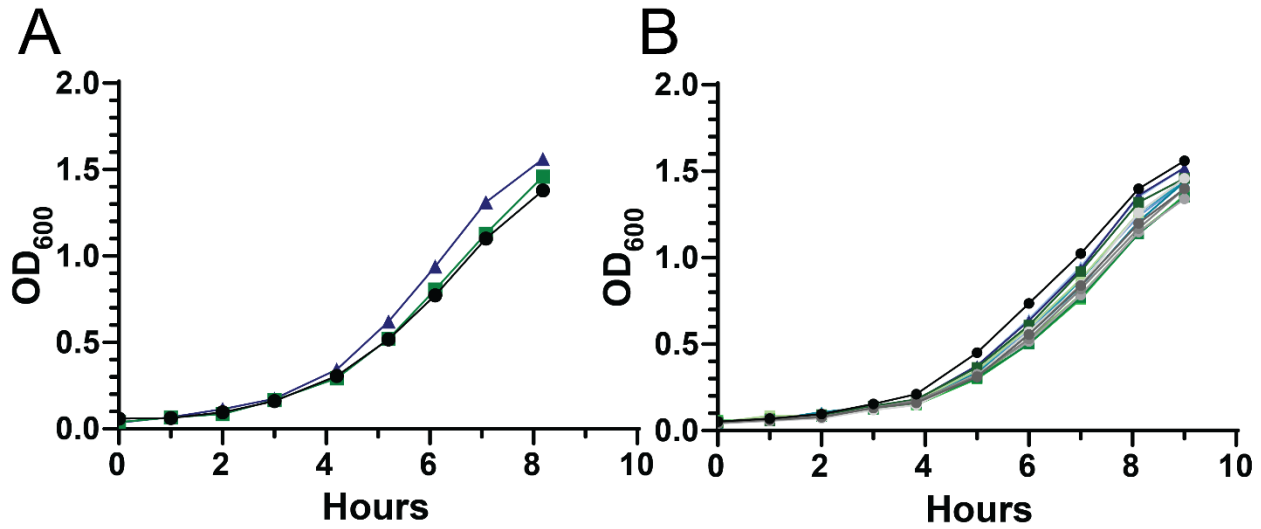

| Strain                          | Doubling Times (in min) |
|---------------------------------|-------------------------|
| ● UA159                         | 82 ± 2                  |
| ▲ <i>P<sub>shp</sub>-luxAB</i>  | 80 ± 2                  |
| ■ <i>P<sub>wgkA</sub>-luxAB</i> | 82 ± 1                  |

| Strain                          | Doubling Times (in min) |
|---------------------------------|-------------------------|
| ● UA159                         | 82 ± 4.5                |
| ● 100 nM SHP                    | 86 ± 5.5                |
| ● 1 μM SHP                      | 89 ± 2                  |
| ● 10 μM SHP                     | 91 ± 2.5                |
| ● 10 μM revSHP                  | 79 ± 4                  |
| ■ <i>P<sub>wgkA</sub>-luxAB</i> | 81 ± 1                  |
| ■ 100 nM SHP                    | 90 ± 2.5                |
| ■ 1 μM SHP                      | 86 ± 0                  |
| ■ 10 μM SHP                     | 89 ± 1.5                |
| ■ 10 μM revSHP                  | 82 ± 0                  |
| ▲ <i>P<sub>shp</sub>-luxAB</i>  | 80 ± 1                  |
| ▲ 100 nM SHP                    | 84 ± 2                  |
| ▲ 1 μM SHP                      | 84 ± 0.5                |
| ▲ 10 μM SHP                     | 85 ± 1.5                |
| ▲ 10 μM revSHP                  | 81 ± 2.5                |
