# Supplementary material for: Quorum Sensing in Streptococcus mutans Regulates Production of Tryglysin, a Novel RaS-RiPP Antimicrobial Compound
Source: PubMed Central journal article supplement (PMC8092268; doi:10.1128/mbio.02688-20), 2021-03-16

Figure S2

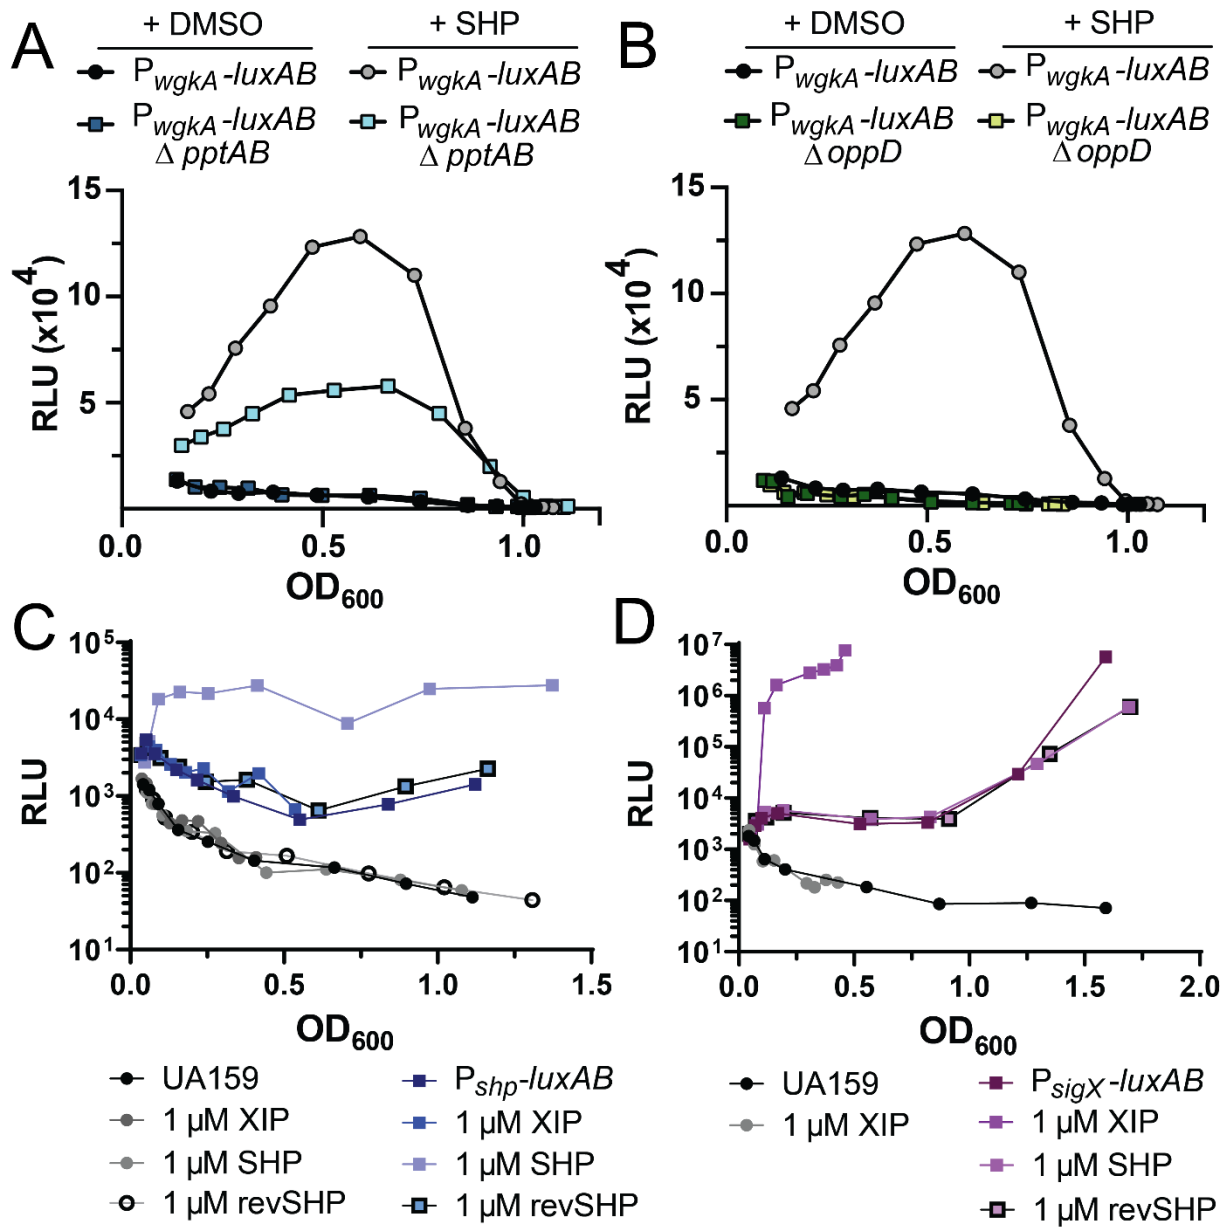

Supplement: mBio.02688-20-sf002.pdf [file mBio.02688-20-sf002.pdf]
