# Supplementary material for: Quorum Sensing in Streptococcus mutans Regulates Production of Tryglysin, a Novel RaS-RiPP Antimicrobial Compound
Source: PubMed Central journal article supplement (PMC8092268; doi:10.1128/mbio.02688-20), 2021-03-16
Supplement: mBio.02688-20-st001.pdf [file mBio.02688-20-st001.pdf]

**TABLE S1.** Bacterial strains, plasmids, and primers used in this study.<sup>a</sup>

| Strain/Plasmid                  | Description                                                                                                                              | Antibiotic Resistance <sup>b</sup>                     | Reference  |
|---------------------------------|------------------------------------------------------------------------------------------------------------------------------------------|--------------------------------------------------------|------------|
| <b><i>S. mutans</i> strains</b> |                                                                                                                                          |                                                        |            |
| BRSM01                          | <i>Streptococcus mutans</i><br>UA159 wild-type reference strain                                                                          | NR                                                     | (1)        |
| BRSM05                          | UA159 $\Delta pdrA::spec$<br>( $\Delta SMU\_1509::spec$ )                                                                                | Spec <sup>R</sup>                                      | This study |
| BRSM08                          | UA159 $\Delta wgkAB_{N-term}::spec^C$                                                                                                    | Spec <sup>R</sup>                                      | This study |
| BRSM38                          | UA159 $\Delta galK::P_c-erm$                                                                                                             | Erm <sup>R</sup>                                       | This study |
| BRSM49                          | UA159 $galK::P_{wgkA-luxAB-P_c-erm}$                                                                                                     | Erm <sup>R</sup>                                       | This study |
| BRSM64                          | UA159 $\Delta rgg::spec$<br>$galK::P_{wgkA-luxAB-P_c-erm}$<br>(BRSM05 transformed with<br>$galK::P_{wgkA-luxAB-P_c-erm}$<br>from BRSM49) | Spec <sup>R</sup> , Erm <sup>R</sup>                   | This study |
| BRSM69                          | UA159 $galK::P_{shp-luxAB-P_c-erm}$                                                                                                      | Erm <sup>R</sup>                                       | This study |
| BRSM73                          | UA159 $\Delta rgg::spec$<br>$galK::P_{shp-luxAB-P_c-erm}$<br>(BRSM05 transformed with<br>$galK::P_{shp-luxAB-P_c-erm}$<br>from BRSM69)   | Spec <sup>R</sup> , Erm <sup>R</sup>                   | This study |
| BRSM85                          | UA159 pLZ12Spec (UA159 transformed with pLZ12Spec)                                                                                       | Spec <sup>R</sup>                                      | This study |
| GS23                            | UA159 $\Delta pptAB::aphA3$<br>pGS101 (JCC263 transformed with pGS101)                                                                   | Km <sup>R</sup> , Erm <sup>R</sup>                     | This study |
| GS105                           | UA159 $\Delta oppD::cat$ pJC301<br>pGS101 (JCC298 was electroporated with pJC301 and pGS101)                                             | Cm <sup>R</sup> , Spec <sup>R</sup> , Erm <sup>R</sup> | This study |
| JCC263                          | UA159 $\Delta pptAB::aphA3$                                                                                                              | Km <sup>R</sup>                                        | (21)       |
| JCC298                          | UA159 $\Delta oppD::cat$<br>pLZ12Spec (BRSM85 was transformed with $\Delta oppD::cat$ )                                                  | Cm <sup>R</sup> , Spec <sup>R</sup>                    | This study |
| MW37                            | UA159 pWAR307 (UA159 transformed with pWAR307)                                                                                           | Cm <sup>R</sup>                                        | This study |
| <b>Other bacterial strains</b>  |                                                                                                                                          |                                                        |            |
| A909                            | <i>Streptococcus agalactiae</i><br>A909 wild-type isolate                                                                                | NR                                                     | (22)       |
| ATCC 10556                      | <i>Streptococcus sanguinis</i><br>ATCC 10556 wild-type isolate, also known as SK1                                                        | NR                                                     | (23)       |
| ATCC 11454                      | <i>Lactococcus lactis</i> ATCC 11454 wild-type isolate                                                                                   | NR                                                     | (24)       |

|                                                                                        |                                                                                                                        |                                     |                    |
|----------------------------------------------------------------------------------------|------------------------------------------------------------------------------------------------------------------------|-------------------------------------|--------------------|
| BH10c                                                                                  | <i>Escherchia coli</i> derivative of DH10B                                                                             | NR                                  | (3)                |
| BL21(DE3)                                                                              | <i>Escherchia coli</i> strain for recombinant plasmid expression                                                       | NR                                  | NEB                |
| BL21(DE3) + pRSFDuet-1_6HMBPwgkA_wgkBC_DSM20646 + pDB1282                              | BL21(DE3) derivative for co-expression of 6HMBPWgkA, WgkB and WgkC from <i>S. ferus</i>                                | Km <sup>R</sup> , Amp <sup>R</sup>  | This study         |
| <i>E. coli</i> BL21(DE3) + pRSFDuet-pRSFDuet-1_6HMBPwgkA_wgkB-rbs-wgkC_UA159 + pDB1282 | B21(DE3) derivative for co-expression of 6HMBPWgkA, WgkB and WgkC from <i>S. mutans</i>                                | Km <sup>R</sup> , Amp <sup>R</sup>  | This study         |
| CCUG 31611                                                                             | <i>Streptococcus mitis</i> CCUG 31611 wild-type isolate, also known as NCTC 12261                                      | NR                                  | (25)               |
| D39                                                                                    | <i>Streptococcus pneumoniae</i> D39 wild-type isolate, from M. E. Winkler                                              | NR                                  | (26)               |
| DH5α                                                                                   | <i>Escherchia coli</i> strain for cloning                                                                              | NR                                  | NEB                |
| DSM 20646                                                                              | <i>Streptococcus ferus</i> DSM 20646 wild-type isolate                                                                 | NR                                  | (6)                |
| JB1                                                                                    | <i>Streptococcus bovis</i> JB1 wild-type isolate                                                                       | NR                                  | (27)               |
| NZ131                                                                                  | <i>Streptococcus pyogenes</i> NZ131 wild-type isolate                                                                  | NR                                  | (2)                |
| <i>S. gordonii</i> Challis                                                             | <i>Streptococcus gordonii</i> Challis Bt wild-type isolate                                                             | NR                                  | (28)               |
| <i>S. oralis</i> 108                                                                   | <i>Streptococcus oralis</i> 108 wild-type isolate, from L. Tao                                                         | NR                                  | (29)               |
| V583                                                                                   | <i>Enterococcus faecalis</i> V583 wild-type isolate                                                                    | Van <sup>R</sup>                    | (30)               |
| <b>Plasmids<sup>d</sup></b>                                                            |                                                                                                                        |                                     |                    |
| pBAD_6HMBPP_HTFLAG                                                                     | Source of 6HMBP tag                                                                                                    | Amp <sup>R</sup>                    | Seyedsayamdost Lab |
| pDB1282                                                                                | Vector for <i>isc</i> operon expression                                                                                | Amp <sup>R</sup>                    | (31)               |
| pEVP3                                                                                  | Template plasmid for P <sub>synca</sub> t chloramphenicol cassette                                                     | Cm <sup>R</sup>                     | (32)               |
| pGS101                                                                                 | pWAR303 derivative with P <sub>wgkA</sub> in front of <i>luxAB</i>                                                     | Erm <sup>R</sup>                    | This study         |
| pGS103                                                                                 | pWAR303 derivative with P <sub>shp</sub> in front of <i>luxAB</i>                                                      | Erm <sup>R</sup>                    | This study         |
| pJC300                                                                                 | pLZ12Spec derivative with P <sub>synca</sub> t chloramphenicol cassette                                                | Cm <sup>R</sup> , Spec <sup>R</sup> | This study         |
| pJC301                                                                                 | pJC300 derivative, amplified by inverse PCR to leave P <sub>synca</sub> t in front of multiple cloning site of plasmid | Spec <sup>R</sup>                   | This study         |

|                                                              |                                                                   |                   |            |                              |
|--------------------------------------------------------------|-------------------------------------------------------------------|-------------------|------------|------------------------------|
| pLZ12Spec                                                    | Shuttle vector encoding spectinomycin resistance; pWV01 origin    | Spec <sup>R</sup> | (33)       |                              |
| pRSFDuet-1                                                   | Co-expression vector                                              | Km <sup>R</sup>   | Novagen    |                              |
| pRSFDuet-1_6HMBP                                             | pRSFDuet-1 modified with a 6HMBP tag coding sequence              | Km <sup>R</sup>   | This study |                              |
| pRSFDuet-1_6HMBPwgkA_wgkBC_DSM20646                          | Co-expression of 6HMBPWgkA, WgkB and WgkC                         | Km <sup>R</sup>   | This study |                              |
| pRSFDuet-1_6HMBPwgkA_wgkB-rbs-wgkC_UA159                     | Co-expression of 6HMBPWgkA, WgkB and WgkC                         | Km <sup>R</sup>   | This study |                              |
| pWAR303                                                      | pFED761 derivative with <i>luxAB</i> fragment                     | Erm <sup>R</sup>  | (34)       |                              |
| pWAR307                                                      | pJC156 derivative with P <sub>sigX</sub> in front of <i>luxAB</i> | Cm <sup>R</sup>   | (34)       |                              |
| <b>Primers used for strain construction<sup>e</sup></b>      |                                                                   |                   |            |                              |
| Primer                                                       | Sequence (5' to 3') <sup>f</sup>                                  | Template          | RE Site    | Amplicon or Plasmid Product  |
| For construction of BRSM05 ( $\Delta pdrA::spec$ )           |                                                                   |                   |            |                              |
| GS111                                                        | TGGGTATGATTTGCTCTC<br>TGCAGGA                                     | UA159             | NotI       | 5' upstream of <i>pdrA</i>   |
| GS112                                                        | AAAAGCGGCCGCAATA<br>GTACCTCAATTGTCTATA<br>TGGG                    |                   |            |                              |
| GS105                                                        | AAAAGCGGCCGCATTA<br>GGATCCAGATCTTCCTTC<br>AGGTTATG                | pLZ12<br>Spec     | NotI, Sall | Spec cassette                |
| GS106                                                        | GCGTGGTCGACGCAAGG<br>GTTTATTGTTTTCTAAAAT<br>CTGAT                 |                   |            |                              |
| GS113                                                        | AAAAGTCGACTAATATGA<br>AATTGTGTATATGGGAT                           | UA159             | Sall       | 3' downstream of <i>pdrA</i> |
| GS114                                                        | AAATAGACGAAATAGCA<br>GCTCCACGAATT                                 |                   |            |                              |
| For construction of BRSM08 ( $\Delta wgkAB_{N-term}::spec$ ) |                                                                   |                   |            |                              |
| GS136                                                        | GCACGTAAGAGCAACAA<br>TCTAG                                        | UA159             | NotI       | 5' upstream of <i>wgkA</i>   |
| GS137                                                        | AAAAGCGGCCGAGTAT<br>TTACCTCCTTGATTTGAT<br>AG                      |                   |            |                              |
| GS105                                                        | AAAAGCGGCCGCATTA<br>GGATCCAGATCTTCCTTC<br>AGGTTATG                | pLZ12<br>Spec     | NotI, Sall | Spec cassette                |
| GS106                                                        | GCGTGGTCGACGCAAGG<br>GTTTATTGTTTTCTAAAAT<br>CTGAT                 |                   |            |                              |
| GS138                                                        | AAAAGTCGACTAAAACAA<br>GGTCTGTAGGTCATTG                            | UA159             | Sall       | 3' downstream of <i>wgkA</i> |
| GS139                                                        | GCTCCAAGAATACCTCC<br>AAATG                                        |                   |            |                              |
| For construction of BRSM38 ( $\Delta galK::P_c-erm$ )        |                                                                   |                   |            |                              |

|                                                                                      |                                                                        |                                                |                                                               |
|--------------------------------------------------------------------------------------|------------------------------------------------------------------------|------------------------------------------------|---------------------------------------------------------------|
| BR94                                                                                 | AGGATATCAACAGCAGT<br>ACGGCCC                                           | UA159                                          | 5' upstream<br>of <i>galK</i>                                 |
| BR95                                                                                 | ATCCATTAAAAATCAAAC<br>GGATCCTATTTCTTTAC<br>TTTTGTTATACTGAAATG<br>AG    |                                                |                                                               |
| BR96                                                                                 | CTCATTTTCAGTATAACAA<br>AAGTAAAGGAAATAGGAT<br>CCGTTTGATTTTTAATGG<br>ATA | <i>P<sub>c-erm</sub></i> cassette <sup>9</sup> | <i>P<sub>c-erm</sub></i><br>cassette                          |
| BR97                                                                                 | ATCTAGTAATGCTGTCAT<br>CGTTTTATTTCTCCCGT<br>TAAATAATAGATAACTAT<br>TA    |                                                |                                                               |
| BR98                                                                                 | TAGTTATCTATTATTTAAC<br>GGGAGGAAATAAAACGA<br>TGACAGCATTACTAGATA<br>CT   | UA159                                          | 3'<br>downstream<br>of <i>galK</i>                            |
| BR99                                                                                 | CAGTGTGATGCGGTGTA<br>TCA                                               |                                                |                                                               |
| For construction of BRSM49 ( <i>galK::P<sub>wgkA</sub>-luxAB-P<sub>c-erm</sub></i> ) |                                                                        |                                                |                                                               |
| BR94                                                                                 | AGGATATCAACAGCAGT<br>ACGGCCC                                           | UA159                                          | 5' upstream<br>of <i>galK</i>                                 |
| BR192                                                                                | CTGCTACTGATTTCTTTT<br>ACTTTTGTTATACTG                                  |                                                |                                                               |
| BR193                                                                                | GTAAAGGAAATCAGTAG<br>CAGCAATGAAATTG                                    | pGS101                                         | <i>P<sub>wgkA</sub>-luxAB</i>                                 |
| BR97                                                                                 | ATCTAGTAATGCTGTCAT<br>CGTTTTATTTCTCCCGT<br>TAAATAATAGATAACTAT<br>TA    |                                                |                                                               |
| BR98                                                                                 | TAGTTATCTATTATTTAAC<br>GGGAGGAAATAAAACGA<br>TGACAGCATTACTAGATA<br>CT   | BRSM38                                         | <i>P<sub>c-erm</sub></i> + 3'<br>downstream<br>of <i>galK</i> |
| BR99                                                                                 | CAGTGTGATGCGGTGTA<br>TCA                                               |                                                |                                                               |
| For construction of BRSM69 ( <i>galK::P<sub>shp</sub>-luxAB-P<sub>c-erm</sub></i> )  |                                                                        |                                                |                                                               |
| BR94                                                                                 | AGGATATCAACAGCAGT<br>ACGGCCC                                           | UA159                                          | 5' upstream<br>of <i>galK</i>                                 |
| BR190                                                                                | GACTGAATATTTCTTTT<br>ACTTTTGTTATACTG                                   |                                                |                                                               |
| BR191                                                                                | GTAAAGGAAAATATTCAG<br>TCATCAATAGTACCTC                                 | pGS103                                         | <i>P<sub>shp</sub>-luxAB</i>                                  |
| BR97                                                                                 | ATCTAGTAATGCTGTCAT<br>CGTTTTATTTCTCCCGT<br>TAAATAATAGATAACTAT<br>TA    |                                                |                                                               |
| BR98                                                                                 | TAGTTATCTATTATTTAAC<br>GGGAGGAAATAAAACGA<br>TGACAGCATTACTAGATA<br>CT   | BRSM38                                         | <i>P<sub>c-erm</sub></i> + 3'<br>downstream<br>of <i>galK</i> |
| BR99                                                                                 | CAGTGTGATGCGGTGTA<br>TCA                                               |                                                |                                                               |

|                                                                       |                                                                          |           |       |                                                                 |
|-----------------------------------------------------------------------|--------------------------------------------------------------------------|-----------|-------|-----------------------------------------------------------------|
| For construction of JCC298 ( $\Delta oppD::cat$ )                     |                                                                          |           |       |                                                                 |
| GS309                                                                 | GCGTG <b>GCGGCCGC</b> TCTT<br>TCTTACAAGATGCTTGGC<br>GA                   | UA159     | NotI  | 5' upstream<br>of <i>oppD</i>                                   |
| GS310                                                                 | GCGTG <b>ATCGATA</b> AACATC<br>GCGAATAGCTTTTA                            |           | Clal  |                                                                 |
| GS311                                                                 | GCGTG <b>ATCGAT</b> GATGAA<br>AATTTGTTTGATTT                             | pEVP3     | Clal  | Cat cassette                                                    |
| GS312                                                                 | GCGTG <b>GTCGAC</b> TTATAA<br>AAGCCAGTCATTAG                             |           | Sall  |                                                                 |
| GS313                                                                 | GCGTG <b>GTCGAC</b> ATGCTG<br>CTACTTGCTGTTAGATG<br>A                     | UA159     | Sall  | 3'<br>downstream<br>of <i>oppD</i>                              |
| GS314                                                                 | GCGTG <b>GCTCGAG</b> AGTACA<br>GTTAAAATAGGACT                            |           | XhoI  |                                                                 |
| For construction of pGS101 (pWAR303 $P_{wgk}$ )                       |                                                                          |           |       |                                                                 |
| GS203                                                                 | AAA <b>ACTGCAG</b> TACCTCCT<br>TGATTTGATAGAATTA                          | UA159     | PstI  | $P_{wgk}$                                                       |
| GS204                                                                 | AAA <b>GTCGAC</b> TTTAGTGT<br>TCCTAAAACAATAAG                            |           | Sall  |                                                                 |
| For construction of pGS103 (pWAR303 $P_{shp}$ )                       |                                                                          |           |       |                                                                 |
| GS206                                                                 | AAA <b>GTCGAC</b> ATATTCAG<br>TCATCAATAGTACCTC                           | UA159     | Sall  | $P_{shp}$                                                       |
| GS207                                                                 | AAA <b>CTGCAG</b> TTCTCCTC<br>ACTCACTTTTCTTAT                            |           | PstI  |                                                                 |
| For construction of pJC300 (pLZ12Spec with $P_{synca}$ -cat cassette) |                                                                          |           |       |                                                                 |
| JC208                                                                 | CATG <b>GAATTC</b> ATTTGTTT<br>GATTTTTAATGG                              | pEVP3     | EcoRI | $P_{synca}$ -cat<br>cassette                                    |
| JC412                                                                 | CATG <b>GAATTC</b> GATGGGT<br>TCCGAGGCTC                                 |           |       |                                                                 |
| For construction of pJC301 (pJC300 $P_{synca}$ )                      |                                                                          |           |       |                                                                 |
| JC413                                                                 | CATGGCGGCCGCATTAG<br>GATCCAGATCTTCCTTCA<br>GGTTATGACCATC                 | pJC300    |       | pJC300<br>$P_{synca}$<br>without cat<br>cassette                |
| JC414                                                                 | CATGGCGGCCGCCCTCC<br>TAAATTTTTATCTAAAGT<br>G                             |           |       |                                                                 |
| For construction of pRSFDuet-1_6HMBPwgkA_wgkBC DSM20646               |                                                                          |           |       |                                                                 |
| <i>wgkA</i> _DSM20646_F                                               | AGTTCTGTTTCAGGGTCC<br>GGAATTCGGATCCATGT<br>CACCTAAAAAAGAGTTTA<br>ATGCTCC | DSM 20646 |       | Cloning<br><i>wgkA</i> into<br>pRSFDuet-<br>1_6HMBP<br>at MCS1  |
| <i>wgkA</i> _DSM20646_R                                               | ATGCGGCCGCAAGCTTG<br>TCGACCTGCAGTTAATG<br>CTTACCCCAACTATTAAC<br>TTAGTTG  |           |       |                                                                 |
| <i>wgkBC</i> _DSM20646_F                                              | GTTAAGTATAAGAAGGA<br>GATATACATATGAGAGAT<br>TATTCGCCATATCCATTA<br>TTAGTAG | DSM 20646 |       | Cloning<br><i>wgkBC</i> into<br>pRSFDuet-<br>1_6HMBP<br>at MCS2 |
| <i>wgkBC</i> _DSM20646_R                                              | GGTTTCTTTACCAGACTC<br>GAGTTATTTCTCCCTAAA<br>AGGTTTTAACTGTAAGTA<br>TATATC |           |       |                                                                 |
| For construction of pRSFDuet-pRSFDuet-1_6HMBPwgkA_wgkB-rbs-wgkC_UA159 |                                                                          |           |       |                                                                 |

|                                        |                                                                           |                                                         |       |                                                                          |
|----------------------------------------|---------------------------------------------------------------------------|---------------------------------------------------------|-------|--------------------------------------------------------------------------|
| <i>wgkA</i> _UA159_F                   | ATGATT <b>GGATCC</b> ATGCT<br>GACCAAAAAAGAGTTCA<br>GCGTGC                 | UA159                                                   | BamHI | Cloning<br><i>wgkA</i> into<br>pRSFDuet-<br>1_6HMBP<br>at MCS1           |
| <i>wgkA</i> _UA159_R                   | TGAAGA <b>CTGCAG</b> TTAAT<br>GTTTGCCCCAGCAGTTC<br>ACTTTGG                |                                                         | PstI  |                                                                          |
| <i>wgkB</i> _UA159_F                   | ACGGT <b>G</b> <b>CATATG</b> CGCGA<br>CTATTCTCCGTATCCG                    | UA159                                                   | NdeI  | Cloning<br><i>wgkB</i> -rbs-C<br>into<br>pRSFDuet-<br>1_6HMBP<br>at MCS2 |
| <i>wgkB</i> -rbs_UA159                 | CATGGTATATCTCCTTAT<br>TAATTATCCTCGTCATAG<br>AAGCATGCCAG                   | UA159                                                   |       |                                                                          |
| rbs- <i>wgkC</i> _UA159                | GACGAGGATAATTAATAA<br>GGAGATATACCATGAAAA<br>ACCATTTCCACCATCAAAG<br>GCAAGC | UA159                                                   |       | Cloning<br><i>wgkB</i> -rbs-C<br>into<br>pRSFDuet-<br>1_6HMBP<br>at MCS2 |
| <i>wgkC</i> _UA159_R                   | GGGGGG <b>CTCGAG</b> TCATA<br>AAGCTTCGCGAAACGGT<br>TTCAGATACAG            | UA159                                                   | XhoI  |                                                                          |
| <b>Primers for qRT-PCR and 5' RACE</b> |                                                                           |                                                         |       |                                                                          |
| Primer                                 | Sequence (5' to 3')                                                       | Description                                             |       |                                                                          |
| BR311                                  | GCTAATCATTGCAAGCAGTG<br>GTATCAACGCAGAGTACATG<br>GG                        | Template switching oligonucleotide (TSO) for<br>5' RACE |       |                                                                          |
| BR312                                  | <u>CATTGCAAGCAGTGGTATCA</u><br>AC                                         | TSO annealing primer                                    |       |                                                                          |
| BR315                                  | CTAGTGCTTACCCCAACAGT<br>TT                                                | Reverse primer for <i>wgkA</i>                          |       |                                                                          |
| BR316                                  | CCCAACAGTTTACCTTAGT<br>TG                                                 | Reverse primer for <i>wgkA</i>                          |       |                                                                          |
| GS116                                  | ATTGTTGCTCGGGCTCTT<br>CC                                                  | Forward primer for <i>gyrA</i> (SMU_1114)               |       |                                                                          |
| GS117                                  | TGCGGCTTGTCAGGAGT<br>AAC                                                  | Reverse primer for <i>gyrA</i> (SMU_1114)               |       |                                                                          |
| GS130                                  | GATGTCTGTTGAGAAGC<br>TGGAT                                                | Forward primer for <i>wgkB</i> (SMU_1508c)              |       |                                                                          |
| GS131                                  | TCTAATAAACGGTTCACC<br>TCCA                                                | Reverse primer for <i>wgkB</i> (SMU_1508c)              |       |                                                                          |
| GS258                                  | CCCTCAACACACTCTGCT<br>AAGCT                                               | Forward primer for <i>irvA</i> (SMU_1397c)              |       |                                                                          |
| GS259                                  | CCAAATCATTGGCCAGTT<br>GAA                                                 | Reverse primer for <i>irvA</i> (SMU_1397c)              |       |                                                                          |
| GS260                                  | AATTCTGATACTGTTGCA<br>G<br>CACCTA                                         | Forward primer for <i>gbcC</i> (SMU_1396)               |       |                                                                          |
| GS261                                  | TTCTGTTGCAGCCGGTT<br>CT                                                   | Reverse primer for <i>gbcC</i> (SMU_1396)               |       |                                                                          |
| GS268                                  | AGGAACAATCCCTTCAG<br>GTAACC                                               | Forward primer for <i>comEA</i> (SMU_625)               |       |                                                                          |
| GS269                                  | CAGTCGTCTGCGTCTTCT<br>TCTG                                                | Reverse primer for <i>comEA</i> (SMU_625)               |       |                                                                          |
| GS270                                  | CTTTTTTCTGGACGTCAC<br>GATTT                                               | Forward primer for <i>comYA</i> (SMU_1987)              |       |                                                                          |

|       |                             |                                            |
|-------|-----------------------------|--------------------------------------------|
| GS271 | TCGCCCTTGATTCATT<br>TAA     | Reverse primer for <i>comYA</i> (SMU_1987) |
| GS274 | CTAGCTGAGAGCGGAAT<br>GAAA   | Forward primer for <i>irvR</i> (SMU_1398)  |
| GS275 | TTTGGCAAACCTTTTCCC<br>TTAAC | Reverse primer for <i>irvR</i> (SMU_1398)  |

<sup>a</sup>Strains were constructed as described in *Materials and Methods*.

<sup>b</sup>Antibiotic resistance markers: NR, no resistance markers; Amp<sup>R</sup>, ampicillin resistance; Spec<sup>R</sup>, spectinomycin resistance; Erm<sup>R</sup>, erythromycin resistance; Km<sup>R</sup>, kanamycin resistance; Cm<sup>R</sup>, chloramphenicol resistance; Van<sup>R</sup>, vancomycin resistance.

<sup>c</sup> $\Delta wgkAB_{N-term}::spec$  refers to a deletion of the coding region of *wgkA* and the first 992 nucleotides of *wgkB*, replaced by a spectinomycin cassette. See *Materials and Methods* for additional details.

<sup>d</sup>All plasmids were constructed and/or propagated in the *E. coli* BH10c, DH5 $\alpha$ , or BL21(DE3) strains.

<sup>e</sup>Genomic DNA of UA159 or indicated plasmid DNA was used as template for PCR or restriction nucleotide reactions.

<sup>f</sup>Bolded and underlined nucleotides indicate engineered restriction sites, if used.

<sup>g</sup>P<sub>c-erm</sub> cassette was derived from fusion of the synthetic P<sub>c</sub> promoter sequence from Land et. al, 2011 (35) with the erythromycin resistance cassette from pWAR303.
