# Supplementary material for: Quorum Sensing in Streptococcus mutans Regulates Production of Tryglysin, a Novel RaS-RiPP Antimicrobial Compound
Source: PubMed Central journal article supplement (PMC8092268; doi:10.1128/mbio.02688-20), 2021-03-16
Supplement: mBio.02688-20-st002.pdf [file mBio.02688-20-st002.pdf]

**Table S2A.** HR-MS and HR-MS/MS data for authentic tryglysin A from *S. ferus* DSM 20646.

| Ion        | Calculated m/z | Observed m/z | $\Delta$ ppm | Sequence |
|------------|----------------|--------------|--------------|----------|
| $b_2^{+1}$ | 214.1186       | 214.1182     | 1.9          | VN       |
| $y_1^{+1}$ | 156.0768       | 156.0776     | 5.1          | H        |
| $y_4^{+1}$ | 523.2412       | 523.2409     | 0.6          | WGKH     |
| $y_5^{+1}$ | 610.2732       | 610.2743     | 1.8          | SWGKH    |
| $y_6^{+1}$ | 724.3161       | 724.3216     | 7.6          | NSWGKH   |
| $MH^{+1}$  | 823.3846       | 823.3868     | 2.7          | VNSWGKH  |

**Table S2B.** HR-MS data for synthetic tryglysin A and B.

| Strain        | <i>S. ferus</i> DSM 20646 |           |              | <i>S. mutans</i> UA159 |           |              |
|---------------|---------------------------|-----------|--------------|------------------------|-----------|--------------|
| Sequence      | VNSWGKH                   |           |              | VNCWGKH                |           |              |
| Ion           | Calc                      | Obs       | $\Delta$ ppm | Calc                   | Obs       | $\Delta$ ppm |
| $[M+1H]^{1+}$ | 823.38456                 | 823.38595 | 1.7          | 839.36172              | 839.35906 | 3.2          |
| $[M+2H]^{2+}$ | 412.19592                 | 412.19676 | 2.0          | 420.18450              | 420.18453 | 0.1          |
| $[M+3H]^{3+}$ | 275.13304                 | 275.13486 | 6.6          | 280.45876              | 280.45928 | 1.9          |

**Table S2C.** HR-MS/MS data for synthetic tryglysin A.

| Ion            | Calculated m/z | Observed m/z | $\Delta$ ppm | Sequence |
|----------------|----------------|--------------|--------------|----------|
| $b_2^{+1}$     | 214.1186       | 214.1163     | 10.7         | VN       |
| $y_1^{+1}$     | 156.0768       | 156.07368    | 20.0         | H        |
| $y_4^{+1}$     | 523.2412       | 523.2393     | 3.6          | WGKH     |
| $y_5^{+1}$     | 610.2732       | 610.2705     | 4.4          | SWGKH    |
| $y_6^{+1}$     | 724.3161       | 724.3134     | 3.7          | NSWGKH   |
| $MH-H_2O^{+1}$ | 805.3740       | 805.3694     | 5.7          | VNSWGKH  |
| $MH-NH_3^{+1}$ | 806.3580       | 806.3561     | 2.4          | VNSWGKH  |
| $MH^{+1}$      | 823.3846       | 823.3814     | 3.9          | VNSWGKH  |

**Table S2D.** HR-MS data for modified HRV-3C-cleaved WgkA peptides, intermediates toward the preparation of synthetic tryglysin A and B (see Materials and Methods).

| Strain        | <i>S. ferus</i> DSM 20646        |            |              | <i>S. mutans</i> UA159           |            |              |
|---------------|----------------------------------|------------|--------------|----------------------------------|------------|--------------|
| Sequence      | GPEFGS-<br>MSPKKEFNAPKTTKVNSWGKH |            |              | GPEFGS-<br>MLTKKEFSVPKTTKVNCWGKH |            |              |
| Ion           | Calc                             | Obs        | $\Delta$ ppm | Calc                             | Obs        | $\Delta$ ppm |
| $[M+2H]^{2+}$ | 1493.23743                       | 1493.23747 | 0.0          | 1516.75969                       | 1516.76051 | 0.5          |
| $[M+3H]^{3+}$ | 995.82738                        | 995.82938  | 2.0          | 1011.50888                       | 1011.50965 | 0.8          |
| $[M+4H]^{4+}$ | 747.12235                        | 747.12758  | 7.0          | 758.88348                        | 758.88480  | 1.7          |
| $[M+5H]^{5+}$ | 597.89934                        | 597.90667  | 12.3         | 607.30824                        | 607.30998  | 2.9          |

18 **Table S2E.** HR-MS/MS data for synthetic tryglysin B.  
19

| Ion        | Calculated m/z | Observed m/z | $\Delta$ ppm | Sequence |
|------------|----------------|--------------|--------------|----------|
| $b_2^{+1}$ | 214.1186       | 214.1179     | 3.3          | VN       |
| $y_1^{+1}$ | 156.0768       | 156.0758     | 6.4          | H        |
| $y_4^{+1}$ | 523.2412       | 523.2329     | 15.9         | WGKH     |
| $y_5^{+1}$ | 626.2504       | 626.2507     | 0.5          | CWGKH    |
| $y_6^{+1}$ | 740.2933       | 740.2923     | 1.4          | NCWGKH   |
| $MH^{+2}$  | 420.1845       | 420.1851     | 1.4          | VNCWGKH  |

20

21
